# Supplementary material for: Amino acid residue at position 188 determines the UV-sensitive bistable property of vertebrate non-visual opsin Opn5
Source: PubMed Central journal article supplement (PMC8766551; doi:10.1038/s42003-022-03010-x), 2022-01-18
Supplement: 42003_2022_3010_MOESM2_ESM.pdf [file 42003_2022_3010_MOESM2_ESM.pdf]

## **Supplementary information for**

Amino acid residue at position 188 determines the UV-sensitive bistable property of vertebrate non-visual opsin Opn5

Authors: Chihiro Fujiyabu <sup>1</sup>, Keita Sato <sup>2</sup>, Yukimi Nishio <sup>1</sup>, Yasushi Imamoto <sup>1</sup>, Hideyo Ohuchi <sup>2</sup>, Yoshinori Shichida <sup>1,3</sup>, Takahiro Yamashita <sup>1\*</sup>

Affiliations: <sup>1</sup> Department of Biophysics, Graduate School of Science, Kyoto University, Kyoto 606-8502, Japan; <sup>2</sup> Department of Cytology and Histology, Okayama University Graduate School of Medicine, Dentistry and Pharmaceutical Sciences, Okayama 700-8558, Japan; <sup>3</sup> Research Organization for Science and Technology, Ritsumeikan University, Shiga 525-8577, Japan

\*Corresponding Author: Takahiro Yamashita, Department of Biophysics, Graduate School of Science, Kyoto University, Kyoto 606-8502, Japan.

Email: [yamashita.takahiro.4z@kyoto-u.ac.jp](mailto:yamashita.takahiro.4z@kyoto-u.ac.jp)

# Supplementary Figure 1

|                  | 10         | 20          | 30          | 40          | 50             |
|------------------|------------|-------------|-------------|-------------|----------------|
| Bovine Rhodopsin | MNGTEGPNFY | VPFSNKTGVV  | RSPFEAPQYY  | LAEPWQFSML  | AAYMFLLLIML    |
| Squid Rhodopsin  | --MGRDLRDN | ETWWYNPSIV  | VHPHWR-EFD  | QVPDAVYYSL  | GIFIGICGII     |
| Mouse Opn5m      | MALNHTALPQ | DERLPHYLRD  | EDPFAS-KLS  | WEADLVAGFY  | LTIIIGILSTF    |
| Xenopus Opn5m    | MAGNSSYREE | SGYIPHYERD  | SDPFAS-KLS  | READIFAGVY  | LMAIGILSTL     |
| Chicken Opn5L1   | -----      | ----MDPSFG  | NSTFQS-KIT  | EAADIVVGTC  | YMVFGICSLC     |
| Xenopus Opn5L1a  | -----      | ----MGLTK-  | NTSFHS-NIP  | HTADNIFGII  | YILFGLCSVL     |
|                  | 60         | 70          | 80          | 90          | 100            |
| Bovine Rhodopsin | GFPINFLLTY | VTVQHKKLRT  | PLNYILLNLA  | VADLFMVFG-  | GFTTTLYTSL     |
| Squid Rhodopsin  | GCGGNGIVYI | LFTKTKSLQT  | PANMFIINLA  | FSDFTFSLVN  | GFPLMTISCF     |
| Mouse Opn5m      | G---NGYVLY | MSSRRKKKLR  | PAEIMTINLA  | VCDLGISVV-  | GKPFITISCF     |
| Xenopus Opn5m    | G---NGYVIY | MACSRKKKLR  | PAEIMTINLA  | VCDLGISVVT  | GKPFIVVSCF     |
| Chicken Opn5L1   | G---NSILLY | ISYKKKHLK   | PAEYFIINLA  | ISDLAMTLT-  | LYPLAVTSSL     |
| Xenopus Opn5L1a  | G---NSTLLY | ISYKRRHLLK  | PAEYFIVNLA  | LSDLAMTVT-  | LYPLAITSSF     |
|                  | 110        | 120         | 130         | 140         | 150            |
| Bovine Rhodopsin | HGYFVFGPTG | CNLEGGFATL  | GGEIALWLSLV | VLAIERVYVVV | CKPMSN-FRF     |
| Squid Rhodopsin  | LKKWIFGFAA | CKVYGFITGI  | FGFMSIMTMA  | MISIDRYNVI  | GRPMAASKKM     |
| Mouse Opn5m      | CHRWVFGWFG | CRWYGWAGFF  | FGCGSLITMT  | AVSLDRYLKI  | CYLSYG-VWL     |
| Xenopus Opn5m    | SHRWVFGWNA | CRWYGWAGFF  | FGCGSLITLT  | VVSLDRYLKI  | CHLRYG-TWL     |
| Chicken Opn5L1   | SHRWLYGKHI | CLFYAFCGLF  | FGICSLSTLT  | LLSVVCCCLKI | CFPAYG-NRF     |
| Xenopus Opn5L1a  | SHRWLYGRHV | CLFYAFCGVL  | FGICSLSTVT  | LLSTICCMKV  | CFPVYG-NRF     |
|                  | 160        | 170         | 180         | 190         | 200            |
| Bovine Rhodopsin | GENHAIMGVA | FTWVMALACA  | APPLVGVSRV  | IPEGMQCSCG  | IDYYTPHEET     |
| Squid Rhodopsin  | SHRRAFIMII | FVWLWSVLWA  | IGPIFGWGAY  | TLEGVLCNCS  | FDYISRSTT      |
| Mouse Opn5m      | KRKHAYICLA | VIWAYASEWT  | TMPLVGLGDY  | APEPFGTSCF  | LDWVLAQASG     |
| Xenopus Opn5m    | KRRHAFIALA | VIWAYATLWA  | TLPLVGVGNV  | APEPFGTCTT  | LDWVLAQASV     |
| Chicken Opn5L1   | RRKHGQILIA | CAWTYAAIFA  | CSPLAHWGEY  | GEEPYGTACC  | IDWQSTNVDV     |
| Xenopus Opn5L1a  | GHKQGCFLVA | CAWLYAAIFA  | FSPLLHWGEY  | GAEPYGTACC  | IDWYSSNKSR     |
|                  | 210        | 220         | 230         | 240         | 250            |
| Bovine Rhodopsin | NNESFVIYMF | VVHFIIPLLV  | IFFCYGQLVF  | TVK-----    | -----EAAAQ     |
| Squid Rhodopsin  | R--SNILCMF | ILGFFGPILI  | IFFCYFNIVM  | SVSNHEKEMA  | AMAKRLNAKE     |
| Mouse Opn5m      | GGQVFILSIL | FFCLLLPTAV  | IVFSYAKIIA  | KVK-----    | SSSKEVAHFD     |
| Xenopus Opn5m    | KGQIFVLSML | FFCLLFPFMV  | IVFSYAKIIA  | KVK-----    | SSSKEVAHFD     |
| Chicken Opn5L1   | MSMSYTVVLF | VLCFILPCGV  | IVTSYSLILV  | TVK-----    | ESRKAVEQHF     |
| Xenopus Opn5L1a  | VAMSYTTTLF | VLCFVIPCGI  | IITSYTLILV  | TVK-----    | DSRKAVEQHG     |
|                  | 260        | 270         | 280         | 290         | 300            |
| Bovine Rhodopsin | QQESATTQKA | EKEVTRMVI   | MVIAFLICWL  | PYAGVAFYIF  | THQGSDFGPI     |
| Squid Rhodopsin  | LRKAQAGANA | EMRLAKISIV  | IVSQFLLSWS  | PYAVVALLAQ  | FGPLEWVTPY     |
| Mouse Opn5m      | SRIHS-SHVL | EVKLTKVAML  | ICAGFLIAWI  | PYAVVSVWSA  | FGRPDSIPIQ     |
| Xenopus Opn5m    | TRNQ-NHTL  | EIKLTKVAML  | ICAGFLIAWF  | PYAVVSVWSA  | FGQPDSPIE      |
| Chicken Opn5L1   | VSGPTRINNV | QTITAKLSIA  | VCIGFFAAWS  | PYAIIAMWAA  | FGSIDKIPPL     |
| Xenopus Opn5L1a  | VAGPSSMNNV | QIIIVKLSIA  | VCIGFFTAWA  | PYAVIAMWAA  | FGSIDIIPPL     |
|                  | 310        | 320         | 330         | 340         | 350            |
| Bovine Rhodopsin | FMTIPAFFAK | TSAVYNPVIY  | IMMKNQFRN-  | -----       | -----CMVTTLCCG |
| Squid Rhodopsin  | AAQLPVMFAK | ASAIHNPMIY  | SVSHPKFREA  | ISQTFP----  | WVLTCCQFDD     |
| Mouse Opn5m      | LSVVPDLLAK | SAAMYNPPIY  | QVIDYRF---  | -----       | -----ACCQAG-   |
| Xenopus Opn5m    | LSVVPMTMAK | SASMYNPPIY  | QVIDCKP---  | -----       | -----ACCKDKK   |
| Chicken Opn5L1   | AFAIPAVFAK | SSTLYNPIIH  | LLLKPNFRSN  | IAKDFTVIQQ  | LCVRCFCVK      |
| Xenopus Opn5L1a  | VFAVPAVFAK | SSTIYNPIIY  | LFLKPNFRNI  | LAKYFPAAQE  | ICTRSCLYMD     |
|                  | 360        | 370         | 380         | 390         | 400            |
| Bovine Rhodopsin | KNPLGDDEAS | TTVSKTETSQ  | VAPA-----   | -----       | -----          |
| Squid Rhodopsin  | KETEDDKDAE | TEIPAGESSD  | AAPSADAAQM  | KEMMAMMQKM  | QQQQAAYPPQ     |
| Mouse Opn5m      | GLRGTKKSL  | EDFRLHTVTA  | VRKSSAVLEI  | HPESSSRFTS  | -----          |
| Xenopus Opn5m    | SLQNTTS--- | ---RVYTIIST | FRKS-----   | ---TTSAR--- | -----          |
| Chicken Opn5L1   | ELQT--YRST | FNTGLRTEFKG | KNESSCNALP  | IMEGCSYFPS  | EKGSHTFEFCF    |
| Xenopus Opn5L1a  | SLNSCHYLPV | IQLFHKLKLNK | RNTPASDSGK  | SMEEYPCYSC  | DQCKDTFEYF     |
|                  | 410        | 420         | 430         | 440         | 450            |
| Bovine Rhodopsin | -----      | -----       | -----       | -----       | -----          |
| Squid Rhodopsin  | GYAPPPQGY  | PQGYPPQGY   | PQGYPPQGY   | PPPQGAPPQ   | APPAAPPQGV     |
| Mouse Opn5m      | -----      | -----AHVMD  | GESHSDNDGC  | GKK-----    | -----          |
| Xenopus Opn5m    | -----      | -----       | -----       | -----       | -----          |
| Chicken Opn5L1   | KSYPNCFQER | LSTMGCHLQD  | CESLENDLQV  | EVTQGSRNSM  | KVVEQEEKST     |
| Xenopus Opn5L1a  | KNYPHHCHEM | LGPTPHTRQD  | GSCLDSNEQA  | MRKNSAKKSI  | KVIVHGQKTS     |
|                  | 460        | 470         |             |             |                |
| Bovine Rhodopsin | -----      | -----       | -           |             |                |
| Squid Rhodopsin  | DNQAYQA--- | -----       | -           |             |                |
| Mouse Opn5m      | -----      | -----       | -           |             |                |
| Xenopus Opn5m    | -----      | -----       | -           |             |                |
| Chicken Opn5L1   | ELDNLEITLE | AVPVSCFTFD  | L           |             |                |
| Xenopus Opn5L1a  | ESDDLEITLE | VIPVCSKCVY  | -           |             |                |

**Supplementary Fig. 1 Comparison of the amino acid sequences among bovine rhodopsin, squid rhodopsin, Opn5m and Opn5L1.**

Amino acid sequences of bovine rhodopsin (K00506), squid (*Todarodes pacificus*) rhodopsin (X70498), mouse Opn5m (AY318865), *Xenopus tropicalis* Opn5m (XM\_002935990), chicken Opn5L1 (AB368181) and *X. tropicalis* Opn5L1a (XM\_031904599) were aligned using ClustalW 2.1<sup>1</sup>. Three residues at positions 167, 188 and 212 are highlighted in red. The sequence similarity between squid rhodopsin and *X. tropicalis* is about 28 %.

## Supplementary Figure 2

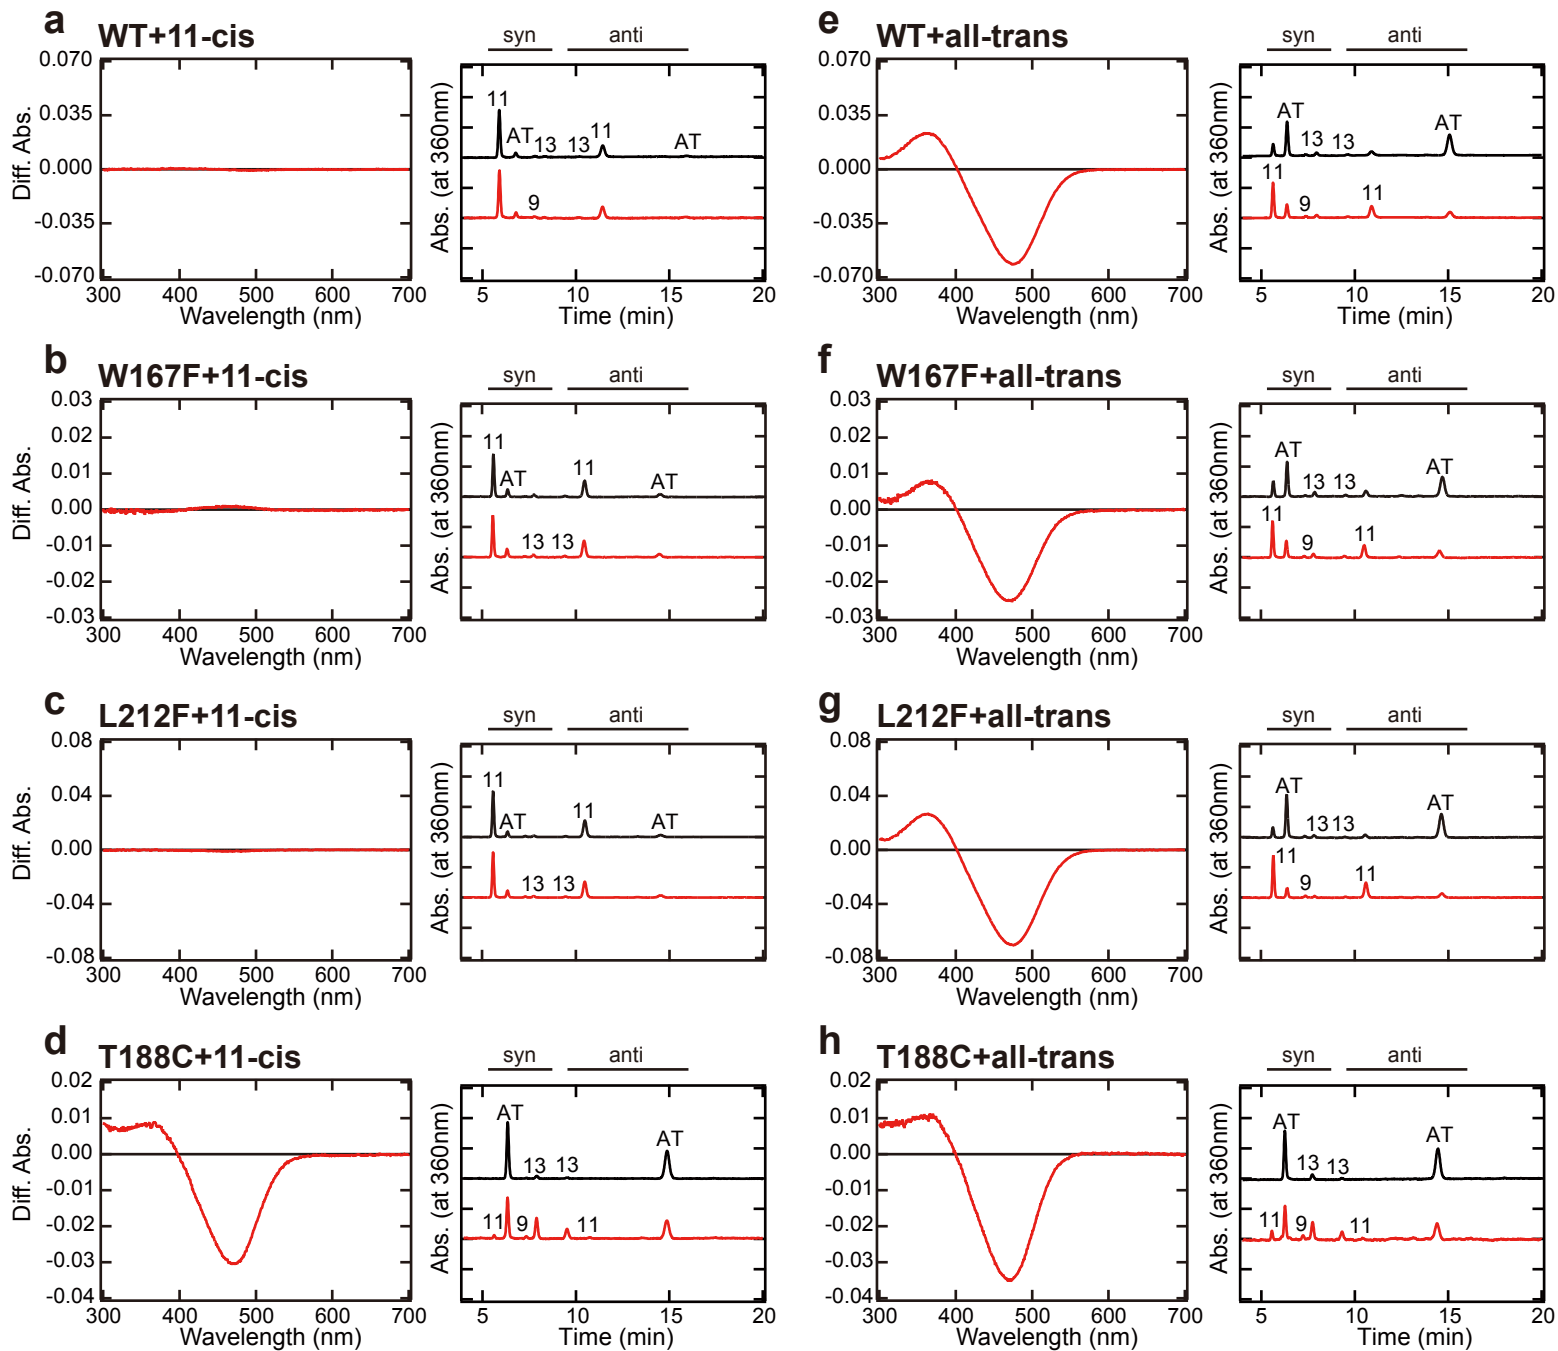

### Supplementary Fig. 2 Spectral changes and retinal configuration changes of wild-type and W167F, L212F and T188C mutant Opn5m proteins

**a-d** (left) Spectral change caused by yellow light (>500 nm) irradiation of Opn5m wild-type (**a**) and W167F (**b**), L212F (**c**) and T188C (**d**) mutant proteins purified after the addition of 11-*cis* retinal to the collected cell membranes. Difference spectrum was calculated based on the spectra shown in Figs. 1b-1e. (right) Retinal isomers before irradiation (black) and after yellow light (>500 nm) irradiation (red) extracted from Opn5m wild-type (**a**) and W167F (**b**), L212F (**c**) and T188C (**d**) mutants purified after the addition of 11-*cis* retinal to the collected cell

membranes (Figs. 1b-1e). Retinal configurations were analyzed with HPLC after extraction of the chromophore as retinal oximes (*syn* and *anti* forms of 9-*cis*, 11-*cis*, 13-*cis*, and all-*trans* retinal oximes). **e-h** (left) Spectral change caused by yellow light (>500 nm) irradiation of Opn5m wild-type (**e**) and W167F (**f**), L212F (**g**) and T188C (**h**) mutant proteins purified after the addition of all-*trans* retinal to the collected cell membranes. Difference spectrum was calculated based on the spectra shown in Figs. 1b-1e. (right) Retinal isomers before irradiation (black) and after yellow light (>500 nm) irradiation (red) extracted from Opn5m wild-type (**e**) and W167F (**f**), L212F (**g**) and T188C (**h**) mutants purified after the addition of all-*trans* retinal to the collected cell membranes (Figs. 1b-1e).

# Supplementary Figure 3

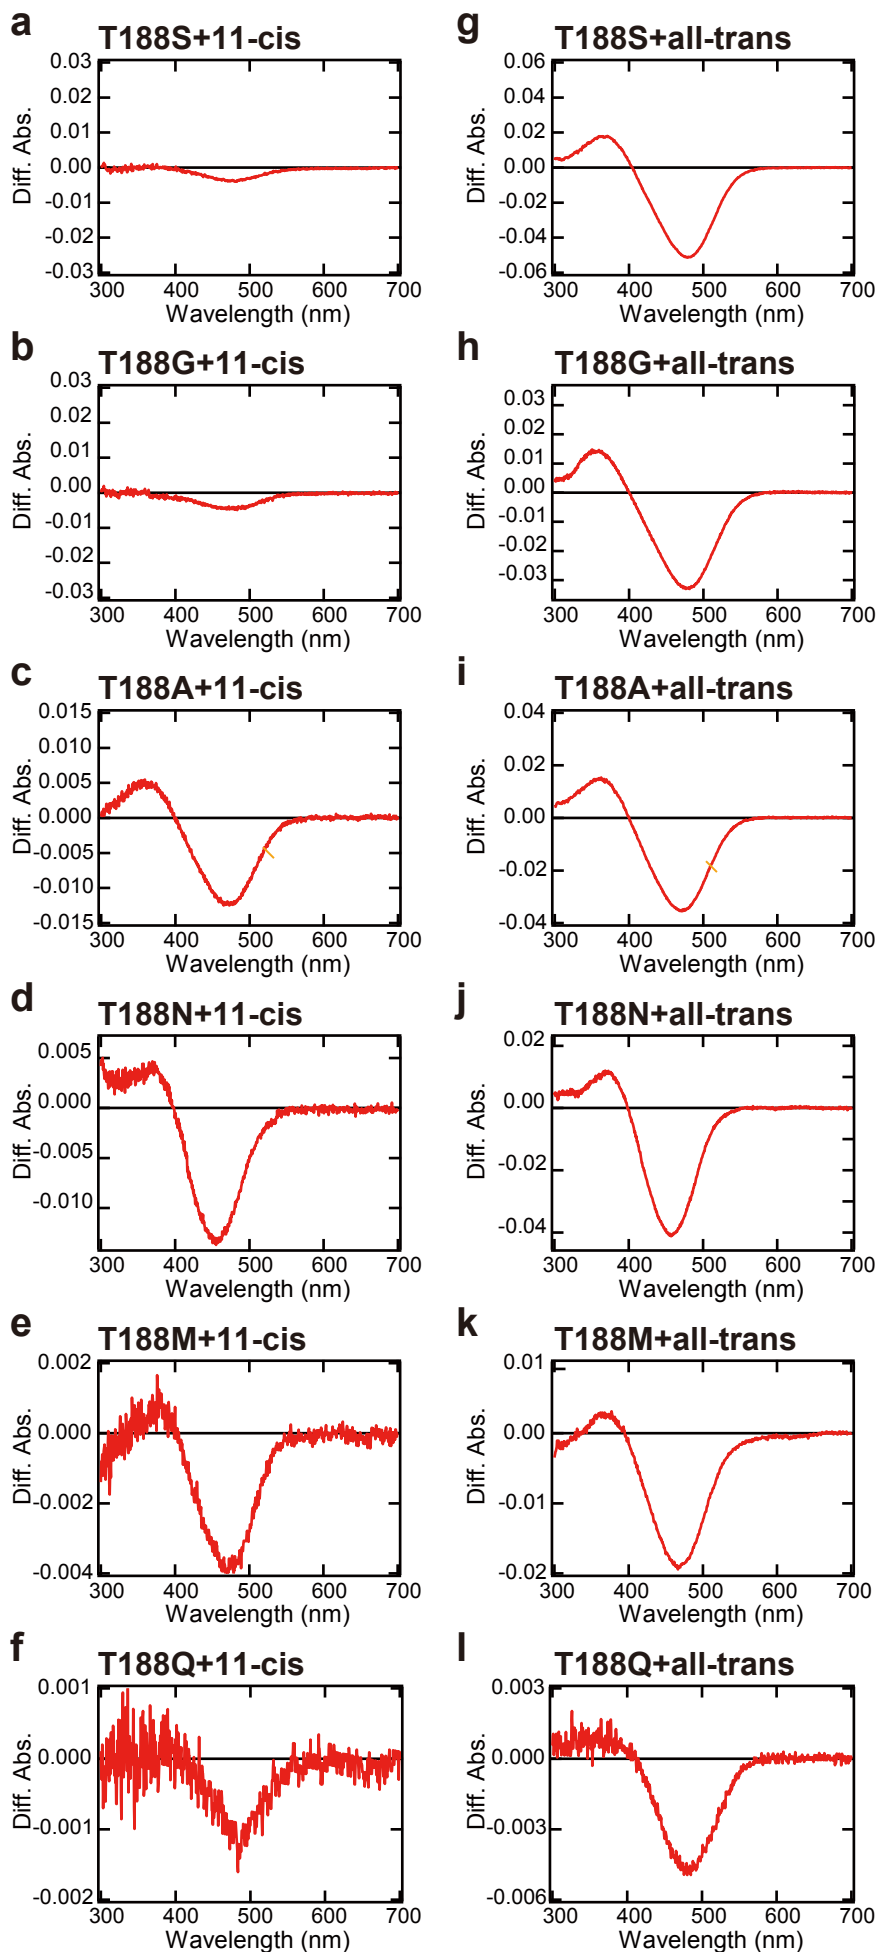

**Supplementary Fig. 3 Spectral changes of Opn5m Thr188 mutant proteins after the addition of 11-*cis* or all-*trans* retinal**

**a-f** Spectral change caused by yellow light (>500 nm) irradiation of Opn5m T188S (**a**), T188G (**b**), T188A (**c**), T188N (**d**), T188M (**e**), and T188Q (**f**) mutant proteins purified after the addition of 11-*cis* retinal to the collected cell membranes. Difference spectrum was calculated based on the spectra shown in Figs. 2a-2f. **g-l** Spectral change caused by yellow light (>500 nm) irradiation of Opn5m T188S (**g**), T188G (**h**), T188A (**i**), T188N (**j**), T188M (**k**), and T188Q (**l**) mutant proteins purified after the addition of all-*trans* retinal to the collected cell membranes. Difference spectrum was calculated based on the spectra shown in Figs. 2g-2l.

# Supplementary Figure 4

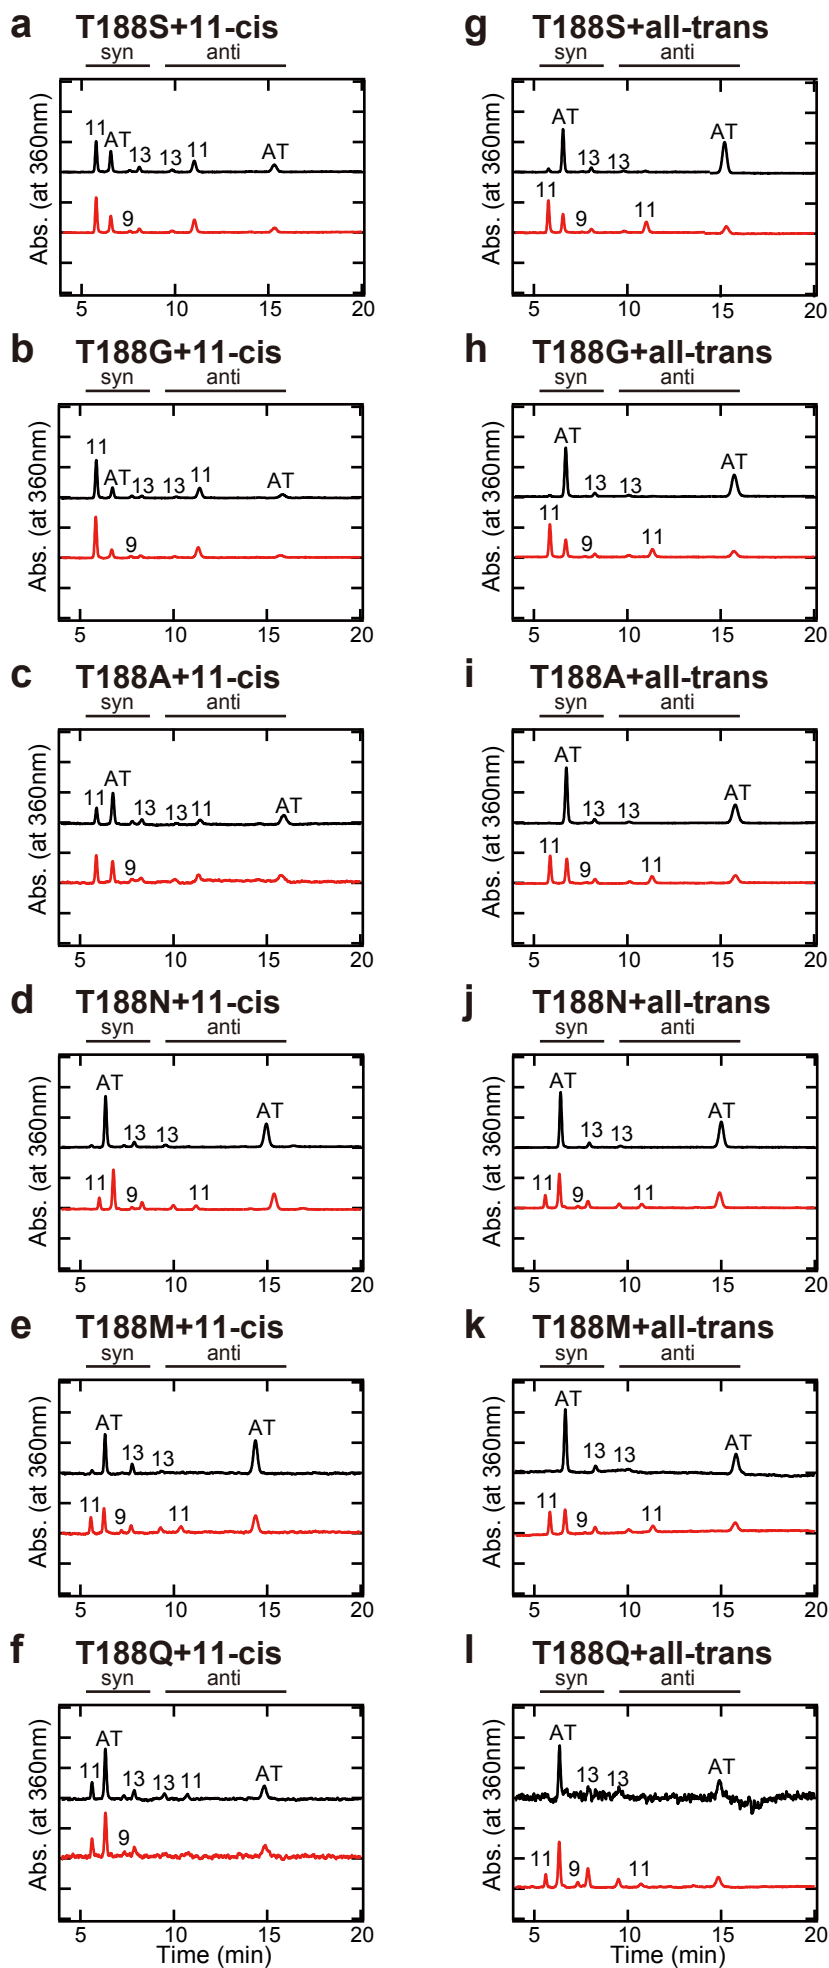



#### **Supplementary Fig. 4 HPLC chromatograms of retinal isomer analysis**

Retinal configurations were analyzed with HPLC after extraction of the chromophore as retinal oximes (*syn* and *anti* forms of 9-*cis*, 11-*cis*, 13-*cis*, and all-*trans* retinal oximes). **a-f** Retinal isomers before irradiation (black) and after yellow light (>500 nm) irradiation (red) were extracted from Opn5m T188S (**a**), T188G (**b**), T188A (**c**), T188N (**d**), T188M (**e**), and T188Q (**f**) mutant proteins purified after the addition of 11-*cis* retinal to the collected cell membranes (Figs. 2a-2f, right). **g-l** Retinal isomers before irradiation (black) and after yellow light (>500 nm) irradiation (red) were extracted from Opn5m T188S (**g**), T188G (**h**), T188A (**i**), T188N (**j**), T188M (**k**), and T188Q (**l**) mutant proteins purified after the addition of all-*trans* retinal to the collected cell membranes (Figs. 2g-2l, right). AT, all-*trans* retinal; 9, 9-*cis* retinal; 11, 11-*cis* retinal; 13, 13-*cis* retinal.

## Supplementary Figure 5

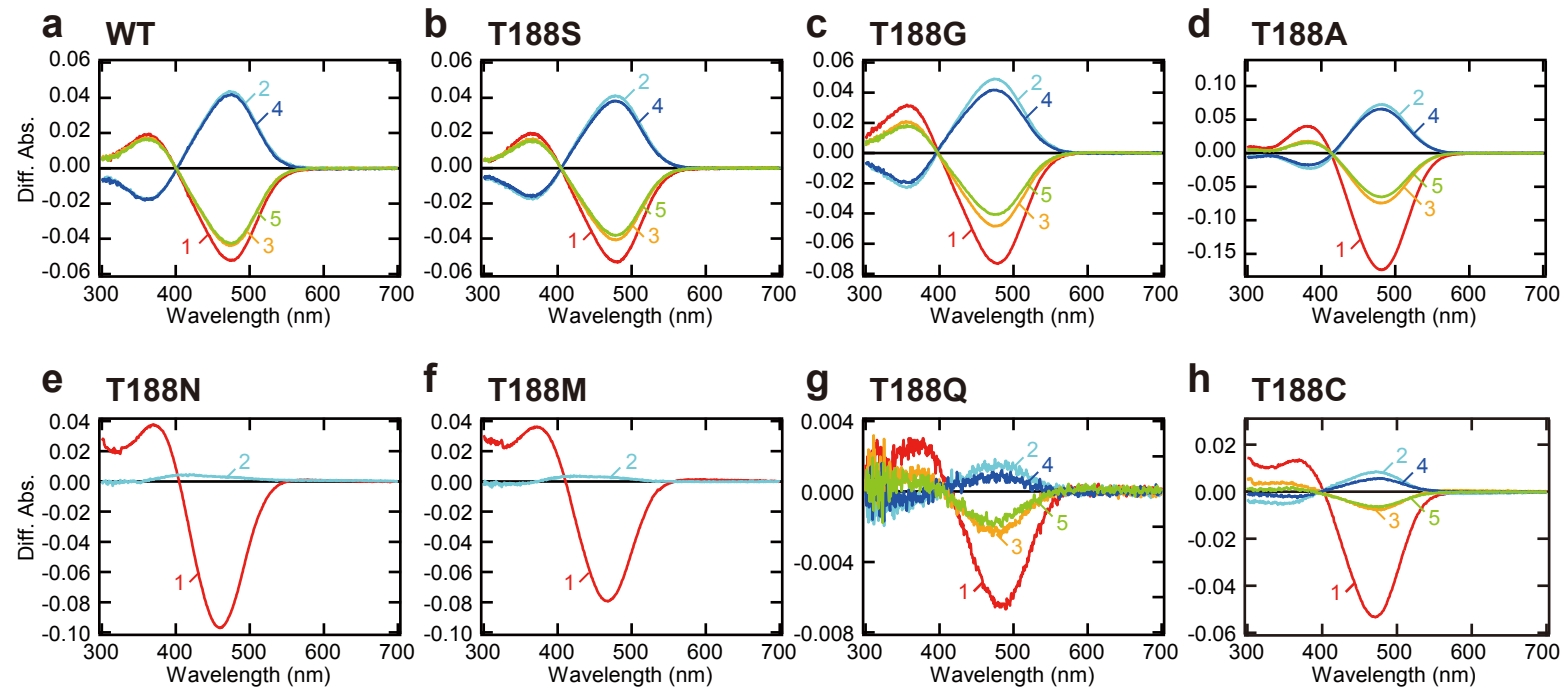

### Supplementary Fig. 5 Spectral changes of Opn5m wild-type and Thr188 mutant proteins

Spectral changes of Opn5m wild-type (a) and T188S (b), T188G (c), T188A (d), T188N (e), T188M (f), T188Q (g) and T188C (h) mutant proteins caused by yellow light (>500 nm) irradiation (curve 1), subsequent UV light (360 nm) irradiation (curve 2), yellow light re-irradiation (curve 3), UV light re-irradiation (curve 4) and yellow light re-irradiation (curve 5) were calculated based on the spectra shown in Fig. 3.

## Supplementary Figure 6

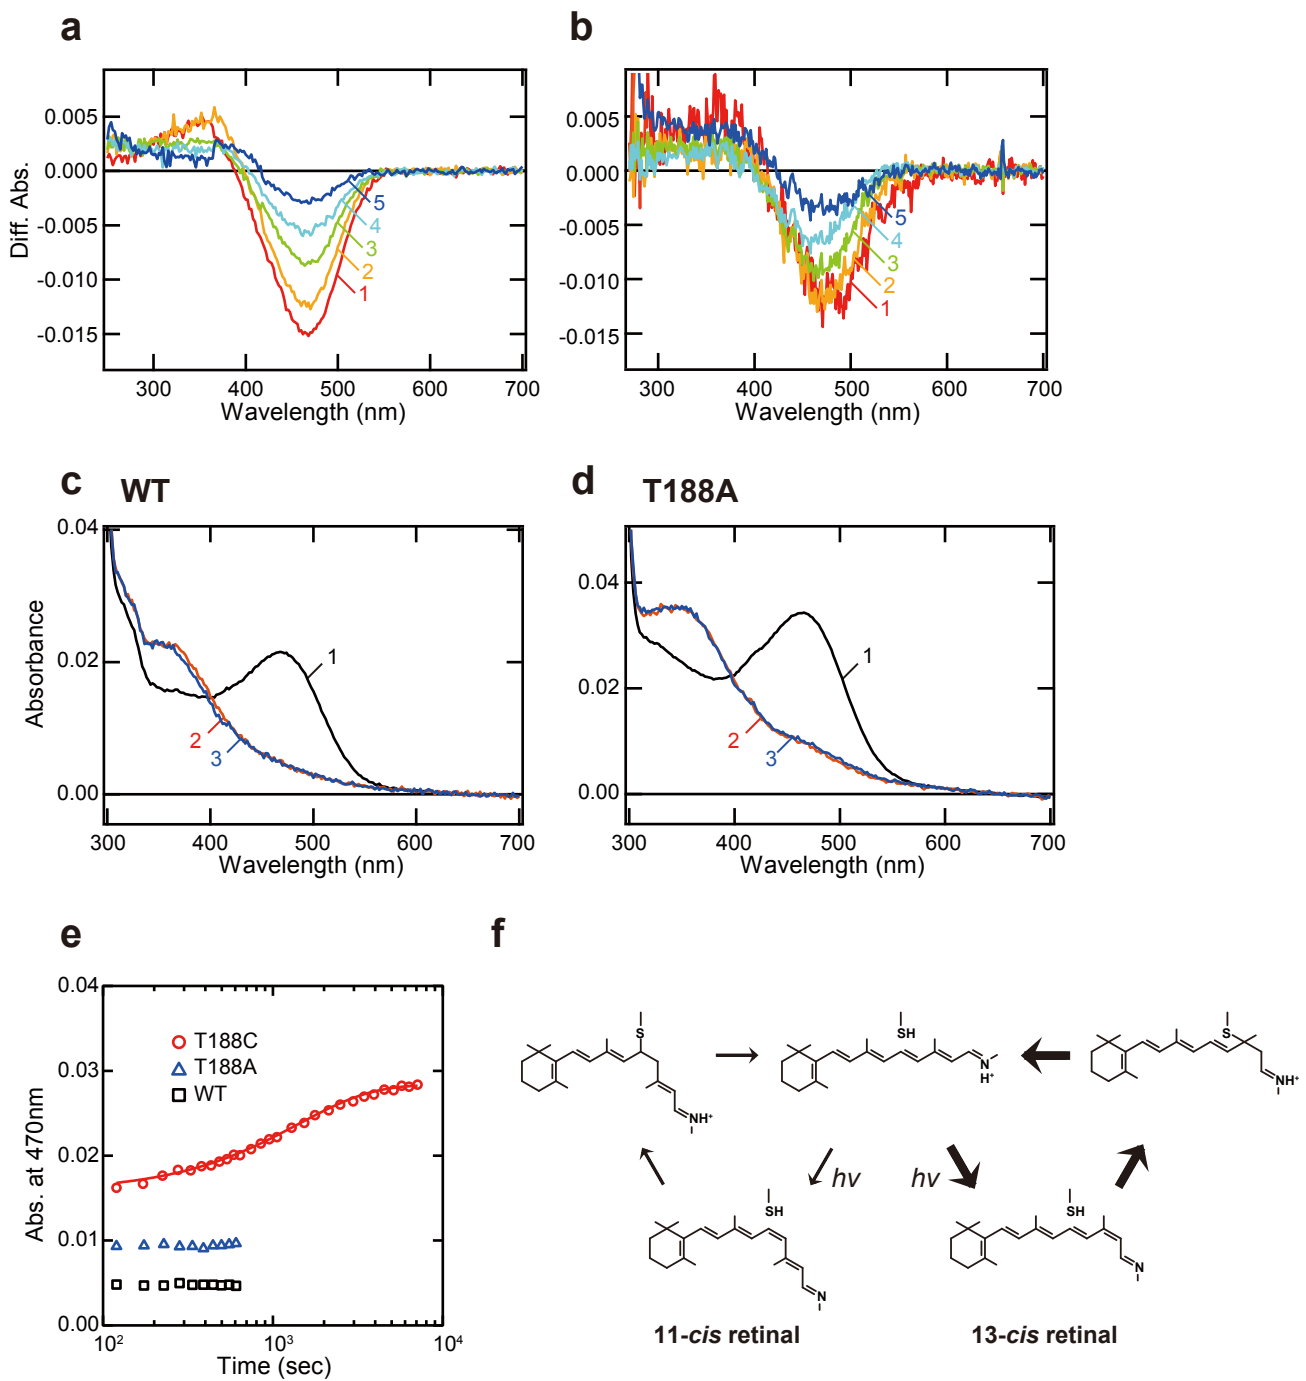

### Supplementary Fig. 6 Spectral changes of T188C mutant Opn5m protein

**a** Spectral changes of Opn5m T188C mutant protein at 10 °C. Difference spectra were obtained by subtracting the spectrum before irradiation (curve 1 of Fig. 4a) from the spectra measured after yellow light (>500 nm) irradiation (curves 2-6 of Fig. 4a) (curves 1-5, respectively). **b** Spectral changes of Opn5m T188C mutant protein at 37 °C. Difference spectra were obtained by subtracting the spectrum before irradiation (curve 1 of Fig. 4b) from the spectra measured after yellow light (>500 nm) irradiation (curves 2-6 of Fig. 4b) (curves 1-5, respectively).

**c,d** Absorption spectra of Opn5m wild-type (**c**) and T188A mutant proteins (**d**) purified after the addition of all-*trans* retinal to the medium of the transfected cultured cells. The spectra were recorded in the dark (curve 1) and 0 min (curve 2) and 30 min (curve 3) after yellow light (>500 nm) irradiation at 10 °C. **e** Absorption change of Opn5m wild-type and T188C and T188A mutant proteins at 470 nm after light irradiation at 10 °C. Time course of the absorbance of T188C mutant protein at 470 nm was fitted with a single-exponential function ( $\tau = 1405.2$  sec). **f** Proposed model of retinal structural changes during the photocyclic reaction of Opn5m T188C mutant protein. Opn5m T188C protein binds all-*trans* retinal in the dark and photoisomerizes it into 13-*cis* and 11-*cis* retinals. These *cis* isomers are expected to form an adduct with the thiol group of Cys188. This accelerates the thermal isomerization of the retinal to all-*trans* form to recover to the original dark state.

## Supplementary Figure 7

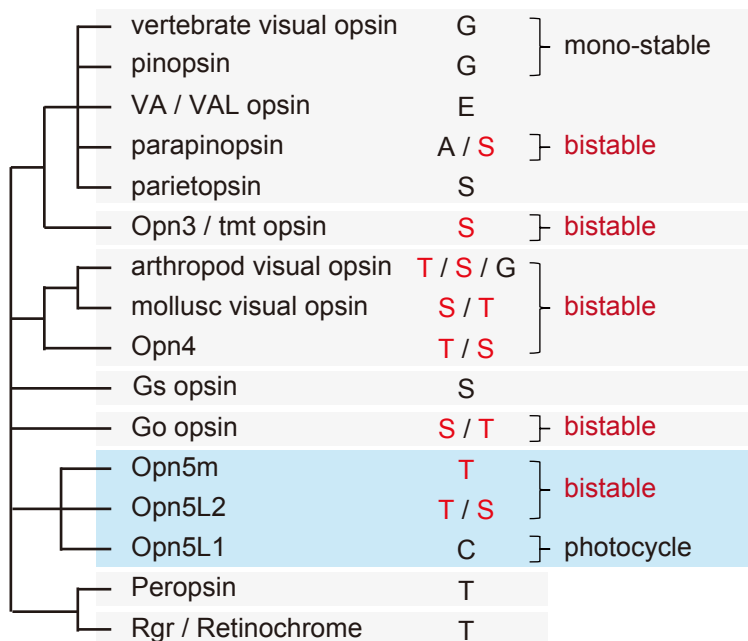

**Supplementary Fig. 7 Phylogenetic view of opsin family and amino acid residue at position 188** Most bistable opsins, including parapinopsin, Opn3/tmt opsin, Gq-coupled opsins, Go-coupled opsins and Opn5m/Opn5L2, have a threonine or serine residue at position 188. By contrast, Opn5L1 uniquely has a cysteine residue at position 188.

## Supplementary References

- 1 Larkin, M. A. *et al.* Clustal W and Clustal X version 2.0. *Bioinformatics* **23**, 2947-2948, doi:10.1093/bioinformatics/btm404 (2007).
