# Supplementary material for: Amino acid residue at position 188 determines the UV-sensitive bistable property of vertebrate non-visual opsin Opn5
Source: PubMed Central journal article supplement (PMC8766551; doi:10.1038/s42003-022-03010-x), 2022-01-18
Supplement: 42003_2022_3010_MOESM3_ESM.pdf [file 42003_2022_3010_MOESM3_ESM.pdf]

## Description of Additional Supplementary Files

**File name:** Supplementary Data 1

**Description:** Source data for Figure 1

**File name:** Supplementary Data 2

**Description:** Source data for Figure 2

**File name:** Supplementary Data 3

**Description:** Source data for Figure 3

**File name:** Supplementary Data 4

**Description:** Source data for Figure 4
